# Supplementary material
Source: publisher figshare collection journal article supplement (https://frontiersin.figshare.com/ndownloader/files/23098901)
Supplement: Supplementary file [file 23098901]

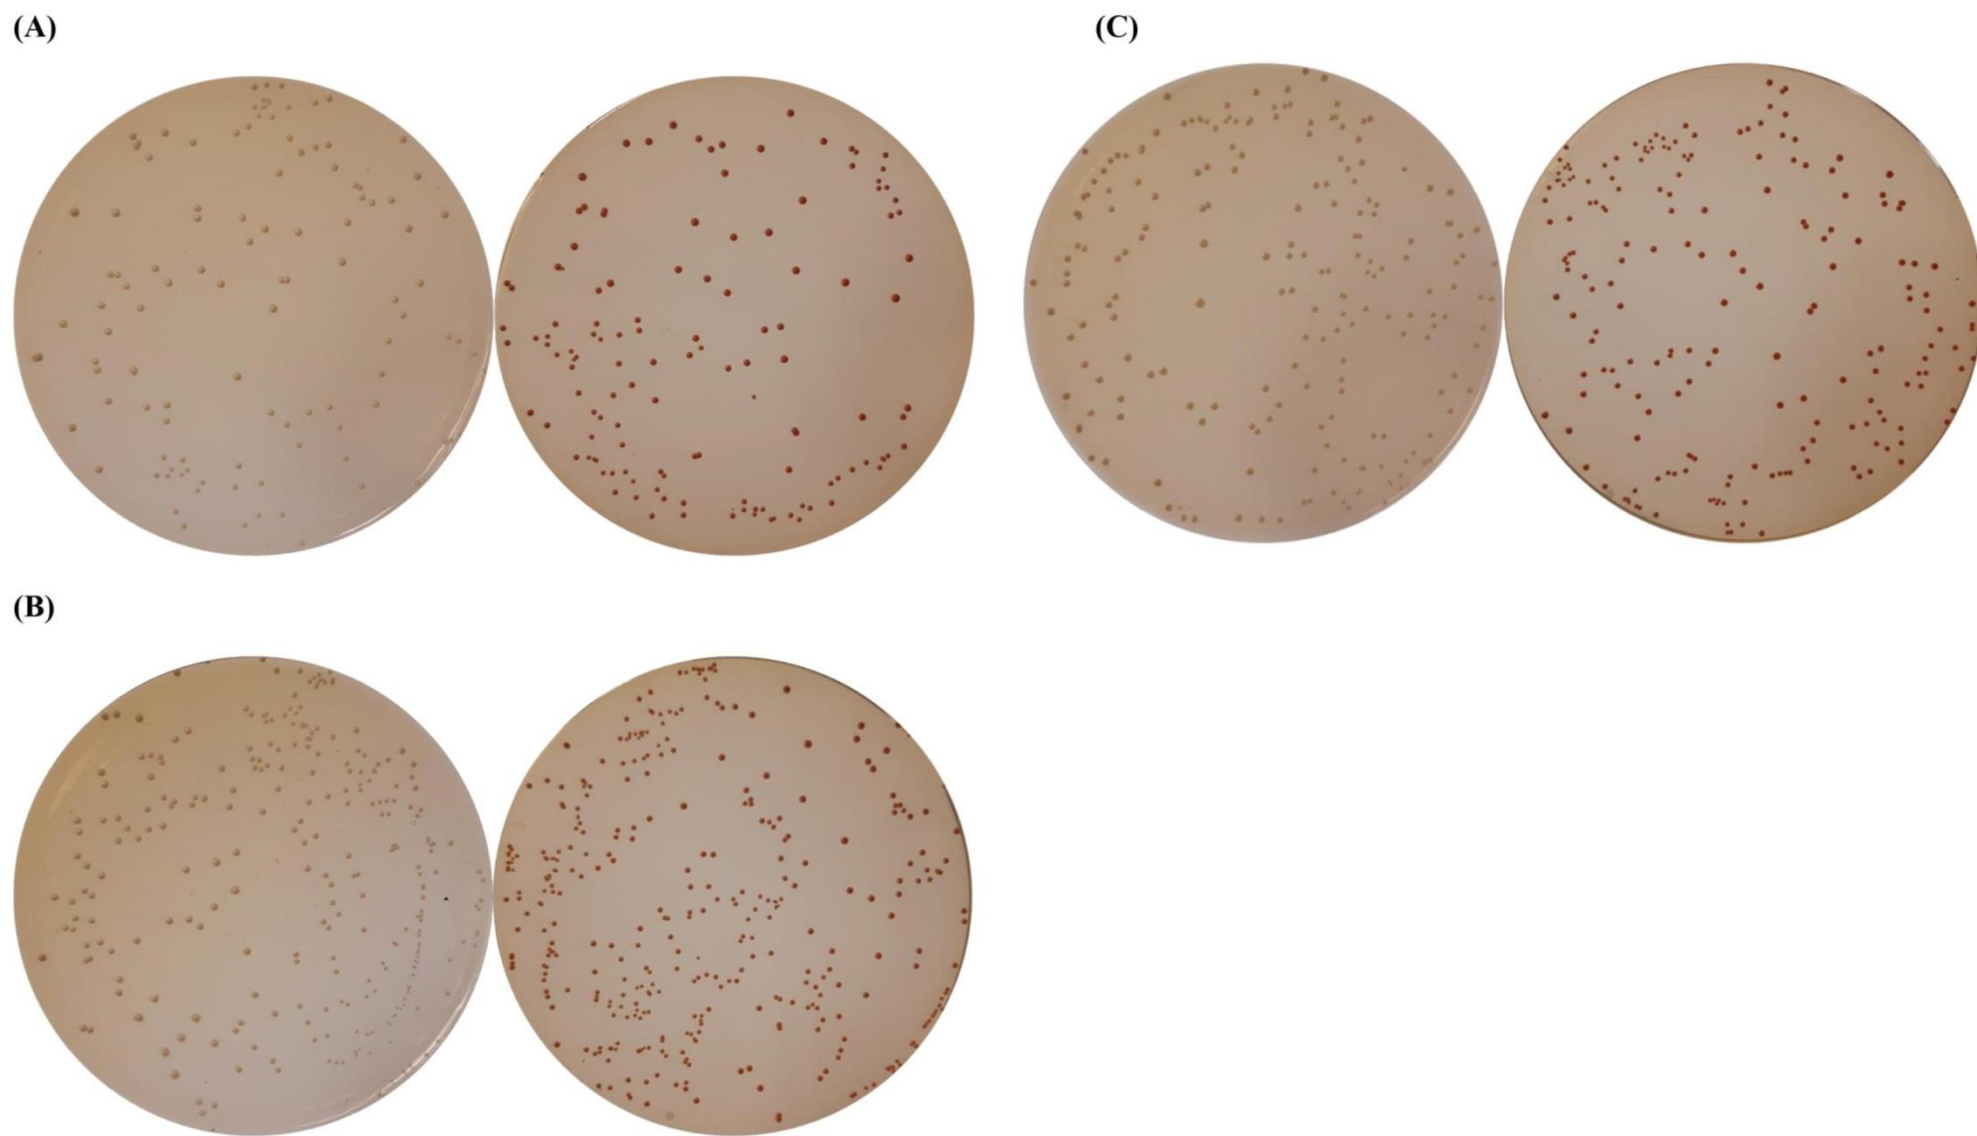

**FIGURE S1.** Images of colonies of (A) *Lb. brevis* CRL 2051, (B) *Lb. plantarum* CRL 2030, and (C) *F. tropaeoli* CRL 2034 grown in MRS-agar (left) and MRS-Se (right), after incubation at 30 °C during 48 h.
